# Supplementary material for: Influence of the glycocalyx and plasma membrane composition on amphiphilic gold nanoparticle association with erythrocytes
Source: Royal Society of Chemistry journal article supplement (doi:10.1039/c5nr01355k), 2015-01-01
Supplement: c5nr01355k4.pdf [file c5nr01355k4.pdf]

| batch | composition | mean size +/- st. dev. (nm) |
|-------|-------------|-----------------------------|
| A     | MUS:OT 2:1  | 2.3 +/- 1.0                 |
| B     | MUS:OT 2:1  | 2.4 +/- 0.8                 |
| C     | MUS:OT 1:1  | 2.1 +/- 0.8                 |
