# Supplementary figures and images for: Influence of the glycocalyx and plasma membrane composition on amphiphilic gold nanoparticle association with erythrocytes
Source: Royal Society of Chemistry journal article supplement (doi:10.1039/c5nr01355k), 2015-01-01

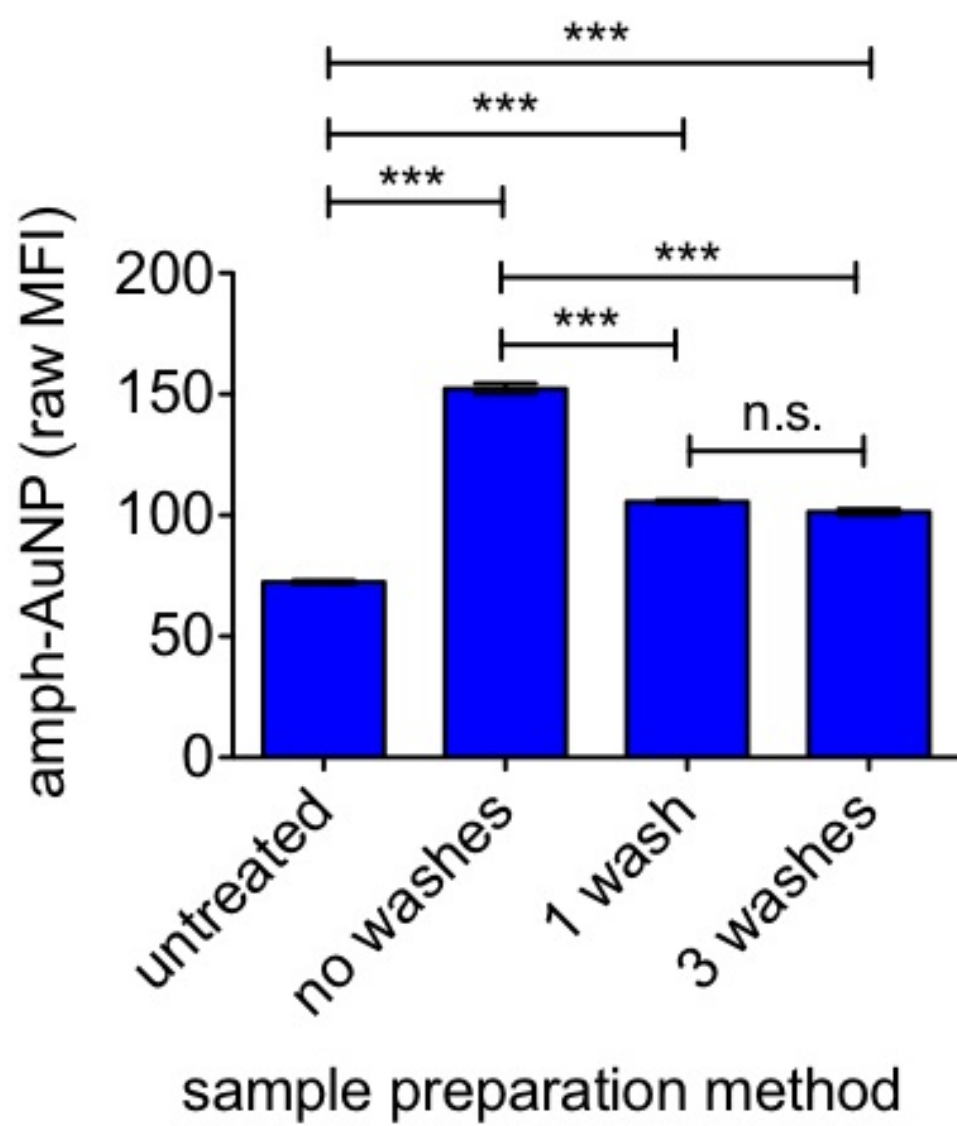

Supplement: c5nr01355k2.pdf [file c5nr01355k2.pdf]

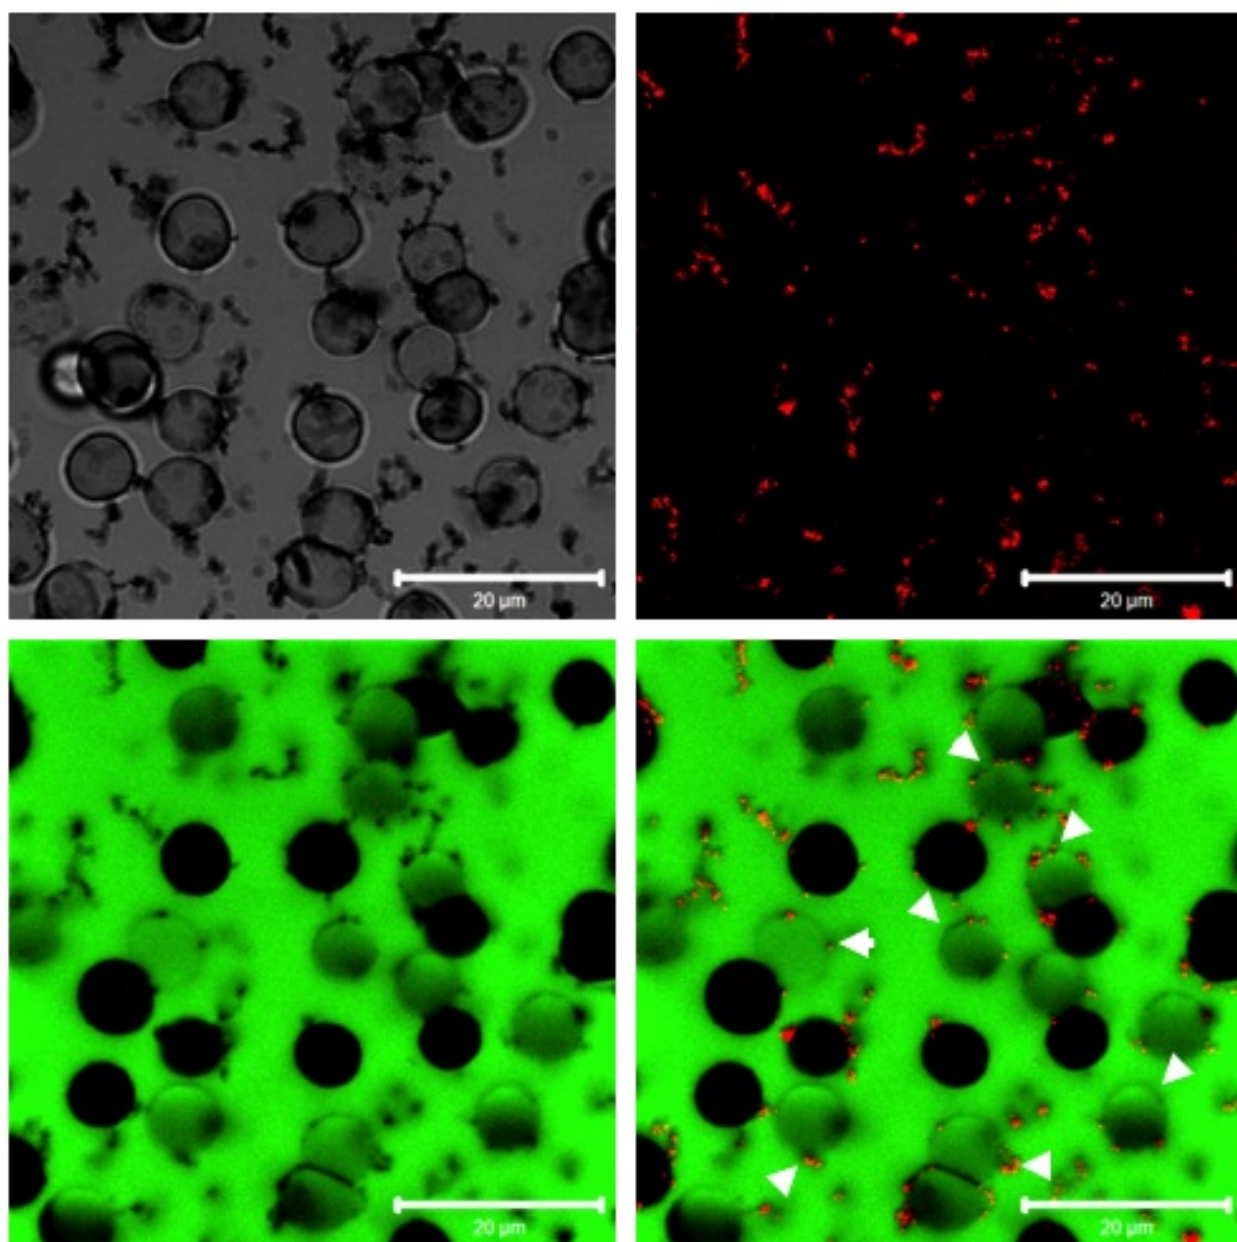

SI Figure 3

Supplement: c5nr01355k3.pdf [file c5nr01355k3.pdf]
